# Supplementary material
Source: MDPI journal article supplement (https://www.mdpi.com/2311-7524/8/9/773)
Supplement: s1 [file s1]

**Table S1.** List of diagnostic primers for RT-qPCR primers in gene expression

| Gene name                    | Abbreviation      | Gene ID <sup>1</sup> | Direction (5'-3') | Sequence               |
|------------------------------|-------------------|----------------------|-------------------|------------------------|
| $\beta$ -Ocimene synthase    | OS                | TR9747_c0_g2_i1      | Forward           | AGAGGTTGACGATTATGTGGAT |
|                              |                   |                      | Reverse           | TTCTGCGACTGTTTCTCTTGT  |
| Limonene synthase            | LS                | TR2025_c0_g1_i1      | Forward           | TCCCAGAAAGGTATGCAGTCA  |
|                              |                   |                      | Reverse           | CTTAGTGGAGGCGAAATGGT   |
| Linalool synthase            | LIS               | MSYJ183890           | Forward           | CATGGAAGCGCCTAAACCAG   |
|                              |                   |                      | Reverse           | TCGAGTCTCGGAAGCCTTTG   |
| $\gamma$ -Terpinene synthase | TPS               | MSYJ045690           | Forward           | GGGGAGATGTTCCCAAATCAA  |
|                              |                   |                      | Reverse           | CCGAATCGAGCACTGTTTCATC |
| $\alpha$ -Terpineol synthase | <i>alpha</i> -TPS | MSYJ196990           | Forward           | AGCAAAAGAGGAGGCCTTGC   |
|                              |                   |                      | Reverse           | TGATGTTGCCAGGTCATTGG   |
| actin                        | ACTIN             | MSYJ081850           | Forward           | CCAAGCAGCATGAAGATCAA   |
|                              |                   |                      | Reverse           | ATCTGCTGGAAGGTGCTGAG   |

<sup>1</sup> "MSYJ" series of gene ID are referenced by Citrus Pan-genome to Breeding Database (CPBD, <http://citrus.hzau.edu.cn/index.php>); "TR" series are selected from NGS contigs which was entrusted to Tri-I Biotech Inc. (Taipei, Taiwan).

**Table S2.** Volatile composition profiles in varieties of *Citrus depressa* in Taiwan

| Compound              | Accession <sup>1</sup> |          |          |          |          |         |          |
|-----------------------|------------------------|----------|----------|----------|----------|---------|----------|
|                       | OWD-1                  | OWD-2    | HLN      | GS-1     | GS-2     | OKN-1   | OKN-2    |
| trans-2-Hexenal       | 19.25b <sup>2</sup>    | 8.54c    | 25.63a   | 11.59c   | 11.73c   | 8.18c   | 9.51c    |
| $\beta$ -Thujene      | 7.70d                  | 8.00cd   | 6.48d    | 10.95ab  | 9.97bc   | 10.27b  | 12.56a   |
| $\alpha$ -Pinene      | 10.51bc                | 10.48bc  | 7.91c    | 12.9ab   | 11.89b   | 11.38b  | 15.41a   |
| $\beta$ -Phellandrene | 1.95b                  | 2.63b    | 1.76b    | 5.11a    | 4.92a    | 5.14a   | 5.44a    |
| $\beta$ -Pinene       | 15.04cd                | 15.16cd  | 13.1d    | 20.68ab  | 18.60bc  | 18.55bc | 24.47a   |
| $\beta$ -Myrcene      | 11.19ab                | 11.74ab  | 9.94b    | 11.68ab  | 10.58ab  | 11.00ab | 12.74a   |
| $\alpha$ -Terpinene   | 9.17c                  | 9.19c    | 8.29c    | 14.38ab  | 12.26b   | 12.79b  | 15.57a   |
| <i>p</i> -Cymene      | 76.42bc                | 85.4abc  | 60.53c   | 78.17abc | 79.92abc | 96.64ab | 108.87a  |
| Limonene              | 28.19bc                | 27.68bc  | 24.30c   | 34.75ab  | 30.61bc  | 32.11ab | 39.54a   |
| $\beta$ -Ocimene      | 59.63a                 | 49.74ab  | 55.81a   | 30.01cd  | 26.71d   | 38.22c  | 38.92bc  |
| $\gamma$ -Terpinene   | 390.89b                | 396.44b  | 371.09b  | 477.95b  | 416.77b  | 470.88b | 609.87a  |
| $\alpha$ -Terpinolene | 10.23bc                | 10.72c   | 9.11c    | 18.38a   | 18.64a   | 14.18b  | 18.10a   |
| 4-Carene              | 15.40cd                | 13.57d   | 12.29d   | 21.27ab  | 18.49bc  | 23.93a  | 19.18abc |
| Linalool              | 1272.25a               | 1446.22a | 1272.15a | 644.86b  | 693.61b  | 625.63b | 722.50b  |
| cis-Sabinene hydrate  | 5.23b                  | 6.99b    | 3.84b    | 17.00a   | 17.68a   | 20.57a  | 20.81a   |
| Terpinen-4-ol         | 11.68a                 | 11.18a   | 10.75a   | 10.25a   | 11.54a   | 11.40a  | 11.85a   |
| $\alpha$ -Terpineol   | 25.04de                | 27.47cde | 21.85e   | 32.28bcd | 35.37ab  | 42.26a  | 33.94bc  |
| Caryophyllene         | 30.29a                 | 19.3bc   | 22.45ab  | 3.52d    | 4.04d    | 16.42c  | 29.01ab  |

|                     |        |        |       |        |         |        |        |
|---------------------|--------|--------|-------|--------|---------|--------|--------|
| $\alpha$ -Farnesene | 2.00d  | 1.09d  | 2.99d | 14.94a | 13.11ab | 4.43cd | 8.61bc |
| Bicyclogermacrene   | 8.21bc | 6.02c  | 6.06c | 13.15a | 10.77ab | 8.08bc | 13.70a |
| $\delta$ -Cadinene  | 3.86a  | 3.09ab | 2.14b | 3.15ab | 2.03b   | 1.74b  | 4.02a  |
| Monoterpene (%)     | 96.8   | 98.2   | 97.1  | 96.9   | 97.1    | 97.4   | 96.3   |
| Sesquiterpene (%)   | 2.2    | 1.4    | 1.6   | 2.3    | 2.1     | 2.1    | 3.1    |

<sup>1</sup> Accessions represent the collecting locations of the germplasm scion. OWD-1 and OWD-2 mean from Ouwanda, Nantou county, HLN means Hualien county, GS-1 and GS-2 are the original sample trees in germplasm, and OKN-1 and OKN-2 mean the scion from Okinawa, Japan.

<sup>2</sup> Relative concentration ( $\text{ng} \cdot \text{g}^{-1}$  FW) was calculated by the rate of peak area of the target compound to the peak area of internal standard (IS), times the concentration and volume of IS, then expressed by per g fresh weight of leaf sample. Data are shown as the average relative concentration by three replicates per tree in one season. The different letters represent the significant difference within varieties by LSD ( $p < 0.05$ ).

**Table S3.** Volatile composition profiles in seasonal variation of *Citrus depressa* in Taiwan

| Compound              | Season             |          |         |         |
|-----------------------|--------------------|----------|---------|---------|
|                       | Spring             | Summer   | Autumn  | Winter  |
| trans-2-Hexenal       | 1.07c <sup>1</sup> | 42.96a   | 5.74b   | 4.19bc  |
| $\beta$ -Thujene      | 12.27b             | 16.71a   | 4.19c   | 4.49c   |
| $\alpha$ -Pinene      | 12.98b             | 21.16a   | 5.39c   | 6.47c   |
| $\beta$ -Phellandrene | 6.08b              | 7.11a    | 0.91c   | 1.30c   |
| $\beta$ -Pinene       | 21.12b             | 34.56a   | 7.51c   | 8.59c   |
| $\beta$ -Myrcene      | 15.13b             | 17.30a   | 5.75c   | 6.89c   |
| $\alpha$ -Terpinene   | 14.81b             | 20.84a   | 5.66c   | 5.35c   |
| <i>p</i> -Cymene      | 113.02b            | 175.03a  | 22.54c  | 24.22c  |
| Limonene              | 40.45b             | 53.21a   | 14.16c  | 16.28c  |
| $\beta$ -Ocimene      | 51.56b             | 74.17a   | 21.84c  | 23.32c  |
| $\gamma$ -Terpinene   | 590.48b            | 770.99a  | 197.54c | 231.78c |
| $\alpha$ -Terpinolene | 31.60a             | 11.08b   | 8.72b   | 5.38c   |
| 4-Carene              | 7.57c              | 41.15a   | 10.36bc | 11.85b  |
| Linalool              | 1421.47a           | 1110.97b | 728.20c | 554.92d |
| cis-Sabinene hydrate  | 29.73a             | 11.17b   | 7.53c   | 4.21d   |
| Terpinen-4-ol         | 14.59a             | 12.71b   | 9.67c   | 7.96d   |
| $\alpha$ -Terpineol   | 52.84a             | 33.74b   | 23.91c  | 14.2d   |
| Caryophyllene         | 10.94b             | 16.24b   | 16.69b  | 27.59a  |
| $\alpha$ -Farnesene   | 14.89a             | 3.19c    | 1.50c   | 7.37b   |
| Bicyclogermacrene     | 0.00b              | 11.74a   | 11.78a  | 14.19a  |
| $\delta$ -Cadinene    | 0.00c              | 4.51a    | 2.32b   | 4.61a   |
| Monoterpenes (%)      | 98.9               | 96.9     | 96.6    | 94.1    |
| Sesquiterpenes (%)    | 1.0                | 1.4      | 2.9     | 5.5     |

<sup>1</sup> Relative concentration ( $\text{ng} \cdot \text{g}^{-1}$  FW) was calculated by the rate of peak area of the target compound to the peak area of internal standard (IS), times the concentration and volume of IS, then expressed by per g fresh weight of leaf sample. Data are shown as the average relative concentration by three replicates per tree in one season. The different letters represent the significant difference within seasons by LSD ( $p < 0.05$ ).

**Table S4.** Standardized determinant function coefficient of volatile components

| Compound              | Score (1) | Score (2) |
|-----------------------|-----------|-----------|
| trans-2-Hexenal       | 0.193     | 0.150     |
| $\beta$ -Thujene      | 3.387     | 2.464     |
| $\alpha$ -Pinene      | -2.790    | -1.996    |
| $\beta$ -Phellandrene | -0.056    | 0.028     |
| $\beta$ -Pinene       | 0.659     | -1.470    |
| $\beta$ -Myrcene      | -0.269    | 2.737     |
| $\alpha$ -Terpinene   | -1.481    | -3.018    |
| p-Cymene              | -0.928    | -0.758    |
| Limonene              | 0.209     | -0.202    |
| $\beta$ -Ocimene      | -1.129    | -1.099    |
| $\gamma$ -Terpinene   | 0.005     | -0.217    |
| $\alpha$ -Terpinolene | 1.602     | 3.026     |
| 4-Carene              | 3.011     | 4.243     |
| Linalool              | -1.027    | 1.227     |
| cis-Sabinene hydrate  | 0.941     | -0.720    |
| Terpinen-4-ol         | 0.614     | -1.369    |
| $\alpha$ -Terpineol   | -1.226    | -1.231    |
| Caryophyllene         | 0.187     | -0.352    |
| $\alpha$ -Farnesene   | 0.465     | 0.342     |
| Bicyclogermacrene     | 0.861     | 0.044     |
| $\delta$ -Cadinene    | -0.735    | -0.143    |

**Table S5.** The relative gene expression of volatile components

| Accession <sup>1</sup> | Genes     |           |               |            |               |
|------------------------|-----------|-----------|---------------|------------|---------------|
|                        | <i>LS</i> | <i>OS</i> | $\gamma$ -TPS | <i>LIS</i> | $\alpha$ -TPS |
| OWD-1                  | 2.659     | 0.500     | 0.947         | 0.374      | 5.284         |
| OWD-2                  | 2.532     | 0.379     | 0.881         | 0.645      | 4.117         |
| HLN                    | 2.654     | 1.067     | 0.469         | 0.375      | 5.878         |
| OKN-1                  | 1.440     | 7.918     | 3.249         | 1.483      | 6.623         |
| OKN-2                  | 1.335     | 4.419     | 1.448         | 0.941      | 4.581         |
| GS-1                   | 0.501     | 4.377     | 2.688         | 5.033      | 15.524        |
| GS-2                   | 0.275     | 3.931     | 2.338         | 2.485      | 17.278        |

<sup>1</sup> Accessions include OWD-1 and OWD-2 (Ouwanda, Nantou), HLN (Hualien), GS-1 and GS-2 (original sample trees in germplasm), and OKN-1 and OKN-2 (Okinawa, Japan). The gene abbreviations respectively represent as follows: *LS*, gene of limonene synthase; *OS*, gene of  $\beta$ -ocimene synthase;  $\gamma$ -TPS and  $\alpha$ -TPS, genes of  $\gamma$ -terpinene synthase and  $\alpha$ -terpinol synthase; *LIS*, gene of linalool synthase.

<sup>2</sup> The relative fold difference was calculated by the comparative cycle threshold ( $2^{-\Delta\Delta Ct}$ ) value.
